# Supplementary material for: Perceptions of Responsible Cat Ownership Behaviors among a Convenience Sample of Australians
Source: PubMed Central journal article supplement (PMC6769723; doi:10.3390/ani9090703), 2019-09-19
Supplement: animals-09-00703-s001.pdf [file animals-09-00703-s001.pdf]

## Living with Cats: Attitudes Towards Cat Ownership

---

Do you own, or have you owned, one or more cats in the last 3 months?

- Yes
- No

What is this cat's name? (If you have more than one cat, please write the cat whose name starts with the letter closest to the letter A.)

\_\_\_\_\_

What sex is [cat's name]?

- Male
- Female

How old is [cat's name]?

- Months \_\_\_\_\_
- Years \_\_\_\_\_

How old was [cat's name] when you acquired him/her?

- Days \_\_\_\_\_
- Months \_\_\_\_\_
- Years \_\_\_\_\_

What was the main reason you acquired [cat's name]?

- Companionship
- The cat needed a home
- To keep other pets company
- For your children
- For pest/rodent control
- To keep other cats away from the home
- Other \_\_\_\_\_

Where did you obtain [cat's name]?

- Pet shop
- Breeder
- Animal shelter
- Friend/Relative
- Advertisement in a newspaper or shop
- Found him/her
- Bred him/her myself
- As a gift
- Other \_\_\_\_\_

How much did [cat's name] cost? If you do not remember, please give your best estimate.

- \$0
- \$1-\$100
- \$101-\$500
- \$501-\$900
- \$901-\$1300
- \$1301-\$1700
- \$1701-\$2100
- >\$2101

Are you primarily responsible for the care of [cat's name]?

- Yes
- No
- Shared equally

Is [cat's name] a pure breed?

- Yes
- No

Before you got [cat's name], how long had you been planning to obtain a cat?

- No time at all (I acquired the cat on impulse)
- About a month
- About 2 or 3 months
- About 6 months
- About a year
- Longer than one year

In your lifetime, about how many cats have you lived with (including current cat/s)?

---

Do you currently own any pets other than [cat's name]?

Yes

No

Is [cat's name]...?

|                                    | Yes                   | No                    | Not Sure              |
|------------------------------------|-----------------------|-----------------------|-----------------------|
| Registered with your local council | <input type="radio"/> | <input type="radio"/> | <input type="radio"/> |
| Microchipped                       | <input type="radio"/> | <input type="radio"/> | <input type="radio"/> |
| Up to date on his/her vaccinations | <input type="radio"/> | <input type="radio"/> | <input type="radio"/> |
| Desexed/Neutered/Spayed            | <input type="radio"/> | <input type="radio"/> | <input type="radio"/> |

Does [cat's name] receive annual health checkups from a veterinarian?

Yes

No

Not Sure

On a typical day, for each of the following time periods, please indicate how often [cat's name] is likely to be outdoors:

|                | Never                 | Some of the time      | About half the time   | Most of the time      | Always                |
|----------------|-----------------------|-----------------------|-----------------------|-----------------------|-----------------------|
| Midnight - 4am | <input type="radio"/> | <input type="radio"/> | <input type="radio"/> | <input type="radio"/> | <input type="radio"/> |
| 4am - 8am      | <input type="radio"/> | <input type="radio"/> | <input type="radio"/> | <input type="radio"/> | <input type="radio"/> |
| 8am - Noon     | <input type="radio"/> | <input type="radio"/> | <input type="radio"/> | <input type="radio"/> | <input type="radio"/> |
| Noon - 4pm     | <input type="radio"/> | <input type="radio"/> | <input type="radio"/> | <input type="radio"/> | <input type="radio"/> |
| 4pm - 8pm      | <input type="radio"/> | <input type="radio"/> | <input type="radio"/> | <input type="radio"/> | <input type="radio"/> |
| 8pm - Midnight | <input type="radio"/> | <input type="radio"/> | <input type="radio"/> | <input type="radio"/> | <input type="radio"/> |

When [cat's name] is outdoors where does s/he spend most of his/her time?

- Not applicable - [cat's name] is solely inside
- Restricted to a cat run
- Restricted to my property
- Closely supervised
- Free roaming
- On a leash
- Other \_\_\_\_\_

When [cat's name] is outdoors, how far from home do you think [cat's name] regularly travels?

- 1m - 50m
- 50m - 100m
- 100m - 500m
- 500m - 1km
- 1km - 5km
- 5km-10km
- >10km
- I don't know

To what extent do you agree or disagree with the following statements about allowing [cat's name] outdoors?

|                                                                              | Strongly disagree     | Disagree              | Neither agree nor disagree | Agree                 | Strongly agree        |
|------------------------------------------------------------------------------|-----------------------|-----------------------|----------------------------|-----------------------|-----------------------|
| I don't see any problem in allowing [cat's name] free access to the outdoors | <input type="radio"/> | <input type="radio"/> | <input type="radio"/>      | <input type="radio"/> | <input type="radio"/> |
| I am confident [cat's name] doesn't catch any wildlife when allowed outside  | <input type="radio"/> | <input type="radio"/> | <input type="radio"/>      | <input type="radio"/> | <input type="radio"/> |
| I am aware of everything [cat's name] catches                                | <input type="radio"/> | <input type="radio"/> | <input type="radio"/>      | <input type="radio"/> | <input type="radio"/> |

How often do you think [cat's name] catches wildlife?

- At least once a day
- Once per week
- Once per month
- Once every few months
- Once a year
- Never
- I don't know

How concerned are you that if [cat's name] was outside she/he may:

|                                      | Not at all concerned  | Slightly concerned    | Somewhat concerned    | Moderately concerned  | Extremely concerned   |
|--------------------------------------|-----------------------|-----------------------|-----------------------|-----------------------|-----------------------|
| Kill introduced (non-native) species | <input type="radio"/> | <input type="radio"/> | <input type="radio"/> | <input type="radio"/> | <input type="radio"/> |
| Kill native wildlife species         | <input type="radio"/> | <input type="radio"/> | <input type="radio"/> | <input type="radio"/> | <input type="radio"/> |

If [cat's name] is allowed outdoors, how concerned are you about the following risks?

|                                                            | Not at all concerned  | Slightly concerned    | Somewhat concerned    | Moderately concerned  | Extremely concerned   |
|------------------------------------------------------------|-----------------------|-----------------------|-----------------------|-----------------------|-----------------------|
| Risk of injury from a car accident                         | <input type="radio"/> | <input type="radio"/> | <input type="radio"/> | <input type="radio"/> | <input type="radio"/> |
| Risk of injury from fights with other cats                 | <input type="radio"/> | <input type="radio"/> | <input type="radio"/> | <input type="radio"/> | <input type="radio"/> |
| Risk of injury from dog attack                             | <input type="radio"/> | <input type="radio"/> | <input type="radio"/> | <input type="radio"/> | <input type="radio"/> |
| Risk of injury from humans                                 | <input type="radio"/> | <input type="radio"/> | <input type="radio"/> | <input type="radio"/> | <input type="radio"/> |
| Risk of upsetting neighbours due to [cat's name] wandering | <input type="radio"/> | <input type="radio"/> | <input type="radio"/> | <input type="radio"/> | <input type="radio"/> |
| Risk of sunburn/cancer                                     | <input type="radio"/> | <input type="radio"/> | <input type="radio"/> | <input type="radio"/> | <input type="radio"/> |
| Risk of injury from wildlife (e.g. snakebite)              | <input type="radio"/> | <input type="radio"/> | <input type="radio"/> | <input type="radio"/> | <input type="radio"/> |
| Risk to wildlife                                           | <input type="radio"/> | <input type="radio"/> | <input type="radio"/> | <input type="radio"/> | <input type="radio"/> |
| Risk of being stolen                                       | <input type="radio"/> | <input type="radio"/> | <input type="radio"/> | <input type="radio"/> | <input type="radio"/> |



To what extent do you agree or disagree with the following statements about keeping [cat's name] indoors?

|                                                                                                                   | Strongly disagree     | Disagree              | Neither agree nor disagree | Agree                 | Strongly agree        |
|-------------------------------------------------------------------------------------------------------------------|-----------------------|-----------------------|----------------------------|-----------------------|-----------------------|
| It is important to provide [cat's name] with toys and other types of stimulation, to keep him/her happy indoors   | <input type="radio"/> | <input type="radio"/> | <input type="radio"/>      | <input type="radio"/> | <input type="radio"/> |
| I am confident that I can provide everything to ensure [cat's name] is happy indoors or in a cat run at all times | <input type="radio"/> | <input type="radio"/> | <input type="radio"/>      | <input type="radio"/> | <input type="radio"/> |
| I am confident I could contain [cat's name] indoors or in a cat run at all times                                  | <input type="radio"/> | <input type="radio"/> | <input type="radio"/>      | <input type="radio"/> | <input type="radio"/> |

Please indicate the extent to which the following considerations influence your decision to **not** keep [cat's name] indoors all the time:

|                                                                                      | Not at all influential | Slightly influential  | Somewhat influential  | Very influential      | Extremely influential |
|--------------------------------------------------------------------------------------|------------------------|-----------------------|-----------------------|-----------------------|-----------------------|
| Cleaning the litter tray                                                             | <input type="radio"/>  | <input type="radio"/> | <input type="radio"/> | <input type="radio"/> | <input type="radio"/> |
| [cat's name] would annoy me trying to get out                                        | <input type="radio"/>  | <input type="radio"/> | <input type="radio"/> | <input type="radio"/> | <input type="radio"/> |
| [cat's name] would be bored if s/he stayed inside all the time                       | <input type="radio"/>  | <input type="radio"/> | <input type="radio"/> | <input type="radio"/> | <input type="radio"/> |
| [cat's name] may spray (inappropriately urinate indoors) if I didn't let him/her out | <input type="radio"/>  | <input type="radio"/> | <input type="radio"/> | <input type="radio"/> | <input type="radio"/> |
| [cat's name] wants to go outdoors                                                    | <input type="radio"/>  | <input type="radio"/> | <input type="radio"/> | <input type="radio"/> | <input type="radio"/> |
| My personal preference                                                               | <input type="radio"/>  | <input type="radio"/> | <input type="radio"/> | <input type="radio"/> | <input type="radio"/> |
| Cats belong outside                                                                  | <input type="radio"/>  | <input type="radio"/> | <input type="radio"/> | <input type="radio"/> | <input type="radio"/> |
| It's what I've always done                                                           | <input type="radio"/>  | <input type="radio"/> | <input type="radio"/> | <input type="radio"/> | <input type="radio"/> |
| My friends/family think cats should be outside                                       | <input type="radio"/>  | <input type="radio"/> | <input type="radio"/> | <input type="radio"/> | <input type="radio"/> |
| Other                                                                                | <input type="radio"/>  | <input type="radio"/> | <input type="radio"/> | <input type="radio"/> | <input type="radio"/> |

What would encourage you to keep [cat's name] indoors at all times?

---

Have you ever lost a cat to: *(please tick all that apply)*

- Car Accident
- Feline Immunodeficiency Virus (FIV)
- Dog attack
- Human attack
- Skin cancer
- Injury from wildlife (e.g. snakebite)
- Ingesting poisons (e.g. rat bait)
- Falling from a height (e.g. out of a window or tree, or off a ledge)
- Unknown, my cat never came home
- Other \_\_\_\_\_
- None of the above

If [cat's name] is allowed outdoors, which of the following factors could make you want to exclusively keep him/her indoors?

|                                                                 | Extremely unlikely    | Unlikely              | Neither likely nor unlikely | Likely                | Extremely likely      |
|-----------------------------------------------------------------|-----------------------|-----------------------|-----------------------------|-----------------------|-----------------------|
| Improving [cat's name]'s mental health                          | <input type="radio"/> | <input type="radio"/> | <input type="radio"/>       | <input type="radio"/> | <input type="radio"/> |
| Improving [cat's name]'s physical health                        | <input type="radio"/> | <input type="radio"/> | <input type="radio"/>       | <input type="radio"/> | <input type="radio"/> |
| Increasing [cat's name]'s life span                             | <input type="radio"/> | <input type="radio"/> | <input type="radio"/>       | <input type="radio"/> | <input type="radio"/> |
| Helping native wildlife                                         | <input type="radio"/> | <input type="radio"/> | <input type="radio"/>       | <input type="radio"/> | <input type="radio"/> |
| Reducing risk of harm to [cat's name] from other humans or dogs | <input type="radio"/> | <input type="radio"/> | <input type="radio"/>       | <input type="radio"/> | <input type="radio"/> |
| Reducing risk of harm to [cat's name] from wildlife             | <input type="radio"/> | <input type="radio"/> | <input type="radio"/>       | <input type="radio"/> | <input type="radio"/> |
| Giving you more one-on-one time with [cat's name]               | <input type="radio"/> | <input type="radio"/> | <input type="radio"/>       | <input type="radio"/> | <input type="radio"/> |
| Improving the relationship/bond [cat's name] has with you       | <input type="radio"/> | <input type="radio"/> | <input type="radio"/>       | <input type="radio"/> | <input type="radio"/> |

Which of the following, if any, do you provide to [cat's name] when she/he is indoors ( *Please tick all that apply*):

- Other cats in the home
- Animals other than cats in the home
- Scratching post
- Window to look out of
- Access to fresh air (e.g. through an open window)
- Access to sunlight
- Litter tray
- An elevated place to sit
- TV left on
- Unrestricted access to the outdoors
- Access to an enclosed outdoor space (e.g. cat run)
- Food treats
- Clean drinking water
- Play gym
- Toys and/or puzzles
- Other \_\_\_\_\_

What type of food does [cat's name] usually eat in an average day?

- Canned food
- Dry food
- Home prepared food
- Commercially prepared raw diet
- Meat and/or bones
- Other \_\_\_\_\_

How many meals is [cat's name] fed per day?

- Less than once
- One
- Two
- Three or more
- Food is always available for my cat

What types of snacks (e.g. Greenies, Liver treats etc), and how many, if any, does [cat's name] usually receive in an average day?

\_\_\_\_\_

Based on the pictures below, please indicate the picture which best represents [cat's name]'s body shape.

- 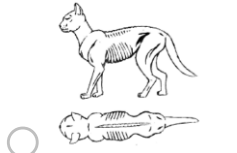
- 
- 
- 
- 

Please consider each of the following words and indicate to what degree it describes [cat's name]'s personality:



|              | Describes [cat's name] NOT AT ALL | Describes [cat's name] ONLY SLIGHTLY | Describes [cat's name] MODERATELY WELL | Describes [cat's name] QUITE WELL | Really DOES describe [cat's name] |
|--------------|-----------------------------------|--------------------------------------|----------------------------------------|-----------------------------------|-----------------------------------|
| Apprehensive | <input type="radio"/>             | <input type="radio"/>                | <input type="radio"/>                  | <input type="radio"/>             | <input type="radio"/>             |
| Clumsy       | <input type="radio"/>             | <input type="radio"/>                | <input type="radio"/>                  | <input type="radio"/>             | <input type="radio"/>             |
| Serious      | <input type="radio"/>             | <input type="radio"/>                | <input type="radio"/>                  | <input type="radio"/>             | <input type="radio"/>             |
| Faithful     | <input type="radio"/>             | <input type="radio"/>                | <input type="radio"/>                  | <input type="radio"/>             | <input type="radio"/>             |
| Cautious     | <input type="radio"/>             | <input type="radio"/>                | <input type="radio"/>                  | <input type="radio"/>             | <input type="radio"/>             |
| Gullible     | <input type="radio"/>             | <input type="radio"/>                | <input type="radio"/>                  | <input type="radio"/>             | <input type="radio"/>             |
| Nervous      | <input type="radio"/>             | <input type="radio"/>                | <input type="radio"/>                  | <input type="radio"/>             | <input type="radio"/>             |
| Independent  | <input type="radio"/>             | <input type="radio"/>                | <input type="radio"/>                  | <input type="radio"/>             | <input type="radio"/>             |
| Confused     | <input type="radio"/>             | <input type="radio"/>                | <input type="radio"/>                  | <input type="radio"/>             | <input type="radio"/>             |
| Curious      | <input type="radio"/>             | <input type="radio"/>                | <input type="radio"/>                  | <input type="radio"/>             | <input type="radio"/>             |
| Loud         | <input type="radio"/>             | <input type="radio"/>                | <input type="radio"/>                  | <input type="radio"/>             | <input type="radio"/>             |
| Energetic    | <input type="radio"/>             | <input type="radio"/>                | <input type="radio"/>                  | <input type="radio"/>             | <input type="radio"/>             |
| Persistent   | <input type="radio"/>             | <input type="radio"/>                | <input type="radio"/>                  | <input type="radio"/>             | <input type="radio"/>             |
| Peaceful     | <input type="radio"/>             | <input type="radio"/>                | <input type="radio"/>                  | <input type="radio"/>             | <input type="radio"/>             |
| Timid        | <input type="radio"/>             | <input type="radio"/>                | <input type="radio"/>                  | <input type="radio"/>             | <input type="radio"/>             |
| Needy        | <input type="radio"/>             | <input type="radio"/>                | <input type="radio"/>                  | <input type="radio"/>             | <input type="radio"/>             |
| Cooperative  | <input type="radio"/>             | <input type="radio"/>                | <input type="radio"/>                  | <input type="radio"/>             | <input type="radio"/>             |
| Quick        | <input type="radio"/>             | <input type="radio"/>                | <input type="radio"/>                  | <input type="radio"/>             | <input type="radio"/>             |

|             |                       |                       |                       |                       |                       |
|-------------|-----------------------|-----------------------|-----------------------|-----------------------|-----------------------|
| Proud       | <input type="radio"/> | <input type="radio"/> | <input type="radio"/> | <input type="radio"/> | <input type="radio"/> |
| Domineering | <input type="radio"/> | <input type="radio"/> | <input type="radio"/> | <input type="radio"/> | <input type="radio"/> |
| Charming    | <input type="radio"/> | <input type="radio"/> | <input type="radio"/> | <input type="radio"/> | <input type="radio"/> |
| Warm        | <input type="radio"/> | <input type="radio"/> | <input type="radio"/> | <input type="radio"/> | <input type="radio"/> |
| Mischievous | <input type="radio"/> | <input type="radio"/> | <input type="radio"/> | <input type="radio"/> | <input type="radio"/> |
| Playful     | <input type="radio"/> | <input type="radio"/> | <input type="radio"/> | <input type="radio"/> | <input type="radio"/> |
| Foolish     | <input type="radio"/> | <input type="radio"/> | <input type="radio"/> | <input type="radio"/> | <input type="radio"/> |
| Persevering | <input type="radio"/> | <input type="radio"/> | <input type="radio"/> | <input type="radio"/> | <input type="radio"/> |
| Confident   | <input type="radio"/> | <input type="radio"/> | <input type="radio"/> | <input type="radio"/> | <input type="radio"/> |
| Territorial | <input type="radio"/> | <input type="radio"/> | <input type="radio"/> | <input type="radio"/> | <input type="radio"/> |
| Demanding   | <input type="radio"/> | <input type="radio"/> | <input type="radio"/> | <input type="radio"/> | <input type="radio"/> |

How hard is it to look after [cat's name]?

- Very easy
- Easy
- Neither hard nor easy
- Hard
- Very hard

To what extent do you agree or disagree with the following statements.

|                                                                                              | Strongly disagree     | Disagree              | Neither agree nor disagree | Agree                 | Strongly Agree        |
|----------------------------------------------------------------------------------------------|-----------------------|-----------------------|----------------------------|-----------------------|-----------------------|
| [cat's name] gives me a reason to get up in the morning.                                     | <input type="radio"/> | <input type="radio"/> | <input type="radio"/>      | <input type="radio"/> | <input type="radio"/> |
| There are major aspects of owning a cat that I don't like.                                   | <input type="radio"/> | <input type="radio"/> | <input type="radio"/>      | <input type="radio"/> | <input type="radio"/> |
| I wish [cat's name] and I never had to be apart.                                             | <input type="radio"/> | <input type="radio"/> | <input type="radio"/>      | <input type="radio"/> | <input type="radio"/> |
| [cat's name] makes too much mess.                                                            | <input type="radio"/> | <input type="radio"/> | <input type="radio"/>      | <input type="radio"/> | <input type="radio"/> |
| It bothers me that [cat's name] stops me from doing things I enjoyed before I owned him/her. | <input type="radio"/> | <input type="radio"/> | <input type="radio"/>      | <input type="radio"/> | <input type="radio"/> |
| It is annoying that sometimes I have to change my plans because of [cat's name].             | <input type="radio"/> | <input type="radio"/> | <input type="radio"/>      | <input type="radio"/> | <input type="radio"/> |
| [cat's name] costs me too much money.                                                        | <input type="radio"/> | <input type="radio"/> | <input type="radio"/>      | <input type="radio"/> | <input type="radio"/> |
| I would like to have [cat's name] near me all the time.                                      | <input type="radio"/> | <input type="radio"/> | <input type="radio"/>      | <input type="radio"/> | <input type="radio"/> |
| If everyone else left me, [cat's name] would still be there for me.                          | <input type="radio"/> | <input type="radio"/> | <input type="radio"/>      | <input type="radio"/> | <input type="radio"/> |
| [cat's name] helps me get through tough times.                                               | <input type="radio"/> | <input type="radio"/> | <input type="radio"/>      | <input type="radio"/> | <input type="radio"/> |

[cat's name]  
provides me  
with constant  
companionship.

[cat's name] is  
there whenever  
I need to be  
comforted.

How often do you...?

|                                                             | Never                 | Once a month          | Once a week           | Once every few days   | At least once a day   |
|-------------------------------------------------------------|-----------------------|-----------------------|-----------------------|-----------------------|-----------------------|
| Kiss [cat's name]                                           | <input type="radio"/> | <input type="radio"/> | <input type="radio"/> | <input type="radio"/> | <input type="radio"/> |
| Play games with [cat's name]                                | <input type="radio"/> | <input type="radio"/> | <input type="radio"/> | <input type="radio"/> | <input type="radio"/> |
| Talk to [cat's name]                                        | <input type="radio"/> | <input type="radio"/> | <input type="radio"/> | <input type="radio"/> | <input type="radio"/> |
| Cuddle [cat's name]                                         | <input type="radio"/> | <input type="radio"/> | <input type="radio"/> | <input type="radio"/> | <input type="radio"/> |
| Have [cat's name] with you while relaxing, i.e. watching TV | <input type="radio"/> | <input type="radio"/> | <input type="radio"/> | <input type="radio"/> | <input type="radio"/> |
| Pet [cat's name]                                            | <input type="radio"/> | <input type="radio"/> | <input type="radio"/> | <input type="radio"/> | <input type="radio"/> |

How often do you...?

|                                                                | Never                 | Once a year           | Once a month          | Once a week           | Once a day            |
|----------------------------------------------------------------|-----------------------|-----------------------|-----------------------|-----------------------|-----------------------|
| Tell [cat's name] things you wouldn't tell anyone else         | <input type="radio"/> | <input type="radio"/> | <input type="radio"/> | <input type="radio"/> | <input type="radio"/> |
| Feel like looking after [cat's name] is a chore                | <input type="radio"/> | <input type="radio"/> | <input type="radio"/> | <input type="radio"/> | <input type="radio"/> |
| Feel like [cat's name] stops you from doing things you want to | <input type="radio"/> | <input type="radio"/> | <input type="radio"/> | <input type="radio"/> | <input type="radio"/> |
| Feel like having a cat is more trouble than it's worth         | <input type="radio"/> | <input type="radio"/> | <input type="radio"/> | <input type="radio"/> | <input type="radio"/> |

How often do you spend time enjoying watching [cat's name]?

- Never
- A couple of times a year
- Once a month
- Once a week
- At least once a day

How often do you buy [cat's name] presents?

- Never
- A couple of times a year
- Once a month
- Once a fortnight
- Once a week

How traumatic do you think it will be for you when [cat's name] dies?

- Very untraumatic
- Untraumatic
- Neither traumatic or untraumatic
- Traumatic
- Very traumatic

Do you intend on getting a cat in the next 6 months?

- Yes
- No

How likely would it be that you would keep your **next** cat exclusively indoors from when you acquired it?

- Extremely unlikely
- Unlikely
- Neither likely nor unlikely
- Likely
- Extremely likely

To what extent do you agree or disagree with the following statements about keeping your **next cat** indoors at all times?

|                                                                                        | Strongly disagree     | Disagree              | Neither agree nor disagree | Agree                 | Strongly agree        |
|----------------------------------------------------------------------------------------|-----------------------|-----------------------|----------------------------|-----------------------|-----------------------|
| I am confident that I could provide enrichment to ensure my next cat was happy indoors | <input type="radio"/> | <input type="radio"/> | <input type="radio"/>      | <input type="radio"/> | <input type="radio"/> |
| I am confident I could contain my next cat indoors or to a cat run at all times        | <input type="radio"/> | <input type="radio"/> | <input type="radio"/>      | <input type="radio"/> | <input type="radio"/> |

What would encourage you to keep your **next** cat indoors at all times? *(Please write)*

---



Have you ever lost a cat to: *(please tick all that apply)*

- Car accident
- Feline Immunodeficiency Virus (FIV)
- Dog attack
- Human attack
- Skin cancer
- Injury from wildlife (e.g. snakebite)
- Ingesting poisons (e.g. rat bait)
- Falling from a height (e.g. out of a window or tree, or off a ledge)
- Unknown, my cat never came home
- Other (please write) \_\_\_\_\_
- None of the above

If you intend to allow your **next** cat to roam outdoors, which of the following could make you want to exclusively keep him/her indoors?

|                                                             | Extremely unlikely    | Unlikely              | Neither likely nor unlikely | Likely                | Extremely likely      |
|-------------------------------------------------------------|-----------------------|-----------------------|-----------------------------|-----------------------|-----------------------|
| Improving your cat's mental health                          | <input type="radio"/> | <input type="radio"/> | <input type="radio"/>       | <input type="radio"/> | <input type="radio"/> |
| Improving your cat's physical health                        | <input type="radio"/> | <input type="radio"/> | <input type="radio"/>       | <input type="radio"/> | <input type="radio"/> |
| Increasing your cat's life span                             | <input type="radio"/> | <input type="radio"/> | <input type="radio"/>       | <input type="radio"/> | <input type="radio"/> |
| Helping native wildlife                                     | <input type="radio"/> | <input type="radio"/> | <input type="radio"/>       | <input type="radio"/> | <input type="radio"/> |
| Reducing risk of harm to your cat from other humans or dogs | <input type="radio"/> | <input type="radio"/> | <input type="radio"/>       | <input type="radio"/> | <input type="radio"/> |
| Reducing risk of harm to your cat from wildlife             | <input type="radio"/> | <input type="radio"/> | <input type="radio"/>       | <input type="radio"/> | <input type="radio"/> |
| Giving you more one-on-one time with your cat               | <input type="radio"/> | <input type="radio"/> | <input type="radio"/>       | <input type="radio"/> | <input type="radio"/> |
| Improving your cat's health                                 | <input type="radio"/> | <input type="radio"/> | <input type="radio"/>       | <input type="radio"/> | <input type="radio"/> |

To what extent do you agree or disagree with the following statements.  
***Cats in general are...?***

|                 | Strongly disagree     | Disagree              | Neither agree nor disagree | Agree                 | Strongly agree        |
|-----------------|-----------------------|-----------------------|----------------------------|-----------------------|-----------------------|
| Loyal           | <input type="radio"/> | <input type="radio"/> | <input type="radio"/>      | <input type="radio"/> | <input type="radio"/> |
| Affectionate    | <input type="radio"/> | <input type="radio"/> | <input type="radio"/>      | <input type="radio"/> | <input type="radio"/> |
| Intelligent     | <input type="radio"/> | <input type="radio"/> | <input type="radio"/>      | <input type="radio"/> | <input type="radio"/> |
| Lovable         | <input type="radio"/> | <input type="radio"/> | <input type="radio"/>      | <input type="radio"/> | <input type="radio"/> |
| Good company    | <input type="radio"/> | <input type="radio"/> | <input type="radio"/>      | <input type="radio"/> | <input type="radio"/> |
| Aggressive      | <input type="radio"/> | <input type="radio"/> | <input type="radio"/>      | <input type="radio"/> | <input type="radio"/> |
| Playful         | <input type="radio"/> | <input type="radio"/> | <input type="radio"/>      | <input type="radio"/> | <input type="radio"/> |
| Spiteful        | <input type="radio"/> | <input type="radio"/> | <input type="radio"/>      | <input type="radio"/> | <input type="radio"/> |
| Friendly        | <input type="radio"/> | <input type="radio"/> | <input type="radio"/>      | <input type="radio"/> | <input type="radio"/> |
| Useful          | <input type="radio"/> | <input type="radio"/> | <input type="radio"/>      | <input type="radio"/> | <input type="radio"/> |
| Aloof           | <input type="radio"/> | <input type="radio"/> | <input type="radio"/>      | <input type="radio"/> | <input type="radio"/> |
| Cuddly          | <input type="radio"/> | <input type="radio"/> | <input type="radio"/>      | <input type="radio"/> | <input type="radio"/> |
| Independent     | <input type="radio"/> | <input type="radio"/> | <input type="radio"/>      | <input type="radio"/> | <input type="radio"/> |
| Low maintenance | <input type="radio"/> | <input type="radio"/> | <input type="radio"/>      | <input type="radio"/> | <input type="radio"/> |
| Expensive       | <input type="radio"/> | <input type="radio"/> | <input type="radio"/>      | <input type="radio"/> | <input type="radio"/> |
| Spiritual       | <input type="radio"/> | <input type="radio"/> | <input type="radio"/>      | <input type="radio"/> | <input type="radio"/> |
| Family members  | <input type="radio"/> | <input type="radio"/> | <input type="radio"/>      | <input type="radio"/> | <input type="radio"/> |
| Dirty           | <input type="radio"/> | <input type="radio"/> | <input type="radio"/>      | <input type="radio"/> | <input type="radio"/> |
| Noisy           | <input type="radio"/> | <input type="radio"/> | <input type="radio"/>      | <input type="radio"/> | <input type="radio"/> |

|         |                       |                       |                       |                       |                       |
|---------|-----------------------|-----------------------|-----------------------|-----------------------|-----------------------|
| Fun     | <input type="radio"/> | <input type="radio"/> | <input type="radio"/> | <input type="radio"/> | <input type="radio"/> |
| Naughty | <input type="radio"/> | <input type="radio"/> | <input type="radio"/> | <input type="radio"/> | <input type="radio"/> |

Approximately what proportion of your family and friends own a cat?

- None
- Less than half
- About half
- More than half
- All

If any of your family and friends own cats, which best describes how most of them are kept?

- Indoors only
- Outdoors only
- Indoors at night, outdoors during the day
- Have unrestricted access to the indoors and outdoors

To what extent do you agree or disagree with the following statements about *cats in general*?

|                                                                         | Strongly disagree     | Disagree              | Neither agree nor disagree | Agree                 | Strongly agree        |
|-------------------------------------------------------------------------|-----------------------|-----------------------|----------------------------|-----------------------|-----------------------|
| Hunting is a natural part of a cat's behaviour                          | <input type="radio"/> | <input type="radio"/> | <input type="radio"/>      | <input type="radio"/> | <input type="radio"/> |
| It is important for a cat's wellbeing that it is allowed to hunt        | <input type="radio"/> | <input type="radio"/> | <input type="radio"/>      | <input type="radio"/> | <input type="radio"/> |
| If a cat is well cared for there is no need to allow it outside to hunt | <input type="radio"/> | <input type="radio"/> | <input type="radio"/>      | <input type="radio"/> | <input type="radio"/> |

To what extent do you agree or disagree with the following statements that all pet cats:

|                                                             | Strongly disagree     | Disagree              | Neither agree nor disagree | Agree                 | Strongly agree        |
|-------------------------------------------------------------|-----------------------|-----------------------|----------------------------|-----------------------|-----------------------|
| Should be kept indoors or in a cat run at <b>night time</b> | <input type="radio"/> | <input type="radio"/> | <input type="radio"/>      | <input type="radio"/> | <input type="radio"/> |
| Should be kept indoors or in a cat run <b>at all times</b>  | <input type="radio"/> | <input type="radio"/> | <input type="radio"/>      | <input type="radio"/> | <input type="radio"/> |

To what extent do you agree or disagree with the following statements. The keeping of pet cats **indoors or in a cat run** at all times...

|                                                             | Strongly disagree     | Disagree              | Neither agree nor disagree | Agree                 | Strongly agree        |
|-------------------------------------------------------------|-----------------------|-----------------------|----------------------------|-----------------------|-----------------------|
| Keeps them safe                                             | <input type="radio"/> | <input type="radio"/> | <input type="radio"/>      | <input type="radio"/> | <input type="radio"/> |
| Is unnatural                                                | <input type="radio"/> | <input type="radio"/> | <input type="radio"/>      | <input type="radio"/> | <input type="radio"/> |
| Is important to protect wildlife                            | <input type="radio"/> | <input type="radio"/> | <input type="radio"/>      | <input type="radio"/> | <input type="radio"/> |
| Is difficult                                                | <input type="radio"/> | <input type="radio"/> | <input type="radio"/>      | <input type="radio"/> | <input type="radio"/> |
| Should be required by law                                   | <input type="radio"/> | <input type="radio"/> | <input type="radio"/>      | <input type="radio"/> | <input type="radio"/> |
| Prevents them from being a nuisance to others               | <input type="radio"/> | <input type="radio"/> | <input type="radio"/>      | <input type="radio"/> | <input type="radio"/> |
| Is not important                                            | <input type="radio"/> | <input type="radio"/> | <input type="radio"/>      | <input type="radio"/> | <input type="radio"/> |
| Is expensive                                                | <input type="radio"/> | <input type="radio"/> | <input type="radio"/>      | <input type="radio"/> | <input type="radio"/> |
| Is good for the cat's health and wellbeing                  | <input type="radio"/> | <input type="radio"/> | <input type="radio"/>      | <input type="radio"/> | <input type="radio"/> |
| Is the right thing to do                                    | <input type="radio"/> | <input type="radio"/> | <input type="radio"/>      | <input type="radio"/> | <input type="radio"/> |
| Is a practice that members of my household would agree with | <input type="radio"/> | <input type="radio"/> | <input type="radio"/>      | <input type="radio"/> | <input type="radio"/> |
| Is a practice my neighbours would agree with                | <input type="radio"/> | <input type="radio"/> | <input type="radio"/>      | <input type="radio"/> | <input type="radio"/> |
| Is a practice my family and friends would agree with        | <input type="radio"/> | <input type="radio"/> | <input type="radio"/>      | <input type="radio"/> | <input type="radio"/> |



Is a practice  
that my  
veterinarian  
would agree  
with

To what extent do you agree or disagree with the following statement that all adult pet cats:

|                                           | Strongly disagree     | Disagree              | Neither agree nor disagree | Agree                 | Strongly agree        |
|-------------------------------------------|-----------------------|-----------------------|----------------------------|-----------------------|-----------------------|
| Should be registered with a local council | <input type="radio"/> | <input type="radio"/> | <input type="radio"/>      | <input type="radio"/> | <input type="radio"/> |

To what extent do you agree or disagree with the following statement that the registration of adult pet cats:

|                                                             | Strongly disagree     | Disagree              | Neither agree nor disagree | Agree                 | Strongly agree        |
|-------------------------------------------------------------|-----------------------|-----------------------|----------------------------|-----------------------|-----------------------|
| Keeps them safe                                             | <input type="radio"/> | <input type="radio"/> | <input type="radio"/>      | <input type="radio"/> | <input type="radio"/> |
| Helps fund important animal services                        | <input type="radio"/> | <input type="radio"/> | <input type="radio"/>      | <input type="radio"/> | <input type="radio"/> |
| Makes it easier to find their owner if they become lost     | <input type="radio"/> | <input type="radio"/> | <input type="radio"/>      | <input type="radio"/> | <input type="radio"/> |
| Is difficult                                                | <input type="radio"/> | <input type="radio"/> | <input type="radio"/>      | <input type="radio"/> | <input type="radio"/> |
| Should be required by law                                   | <input type="radio"/> | <input type="radio"/> | <input type="radio"/>      | <input type="radio"/> | <input type="radio"/> |
| Is unnecessary                                              | <input type="radio"/> | <input type="radio"/> | <input type="radio"/>      | <input type="radio"/> | <input type="radio"/> |
| Is important                                                | <input type="radio"/> | <input type="radio"/> | <input type="radio"/>      | <input type="radio"/> | <input type="radio"/> |
| Is expensive                                                | <input type="radio"/> | <input type="radio"/> | <input type="radio"/>      | <input type="radio"/> | <input type="radio"/> |
| Is the right thing to do                                    | <input type="radio"/> | <input type="radio"/> | <input type="radio"/>      | <input type="radio"/> | <input type="radio"/> |
| Is a practice that members of my household would agree with | <input type="radio"/> | <input type="radio"/> | <input type="radio"/>      | <input type="radio"/> | <input type="radio"/> |
| Is a practice that my neighbours would agree with           | <input type="radio"/> | <input type="radio"/> | <input type="radio"/>      | <input type="radio"/> | <input type="radio"/> |
| Is a practice that my family and friends would agree with   | <input type="radio"/> | <input type="radio"/> | <input type="radio"/>      | <input type="radio"/> | <input type="radio"/> |
| Is a practice that my veterinarian would agree with         | <input type="radio"/> | <input type="radio"/> | <input type="radio"/>      | <input type="radio"/> | <input type="radio"/> |

To what extent do you agree or disagree with the following statement that all pet cats:

|                        | Strongly disagree     | Disagree              | Neither agree nor disagree | Agree                 | Strongly agree        |
|------------------------|-----------------------|-----------------------|----------------------------|-----------------------|-----------------------|
| Should be microchipped | <input type="radio"/> | <input type="radio"/> | <input type="radio"/>      | <input type="radio"/> | <input type="radio"/> |

To what extent do you agree or disagree that the microchipping of pet cats:

|                                                             | Strongly disagree     | Disagree              | Neither agree nor disagree | Agree                 | Strongly agree        |
|-------------------------------------------------------------|-----------------------|-----------------------|----------------------------|-----------------------|-----------------------|
| Keeps them safe                                             | <input type="radio"/> | <input type="radio"/> | <input type="radio"/>      | <input type="radio"/> | <input type="radio"/> |
| Is unnatural                                                | <input type="radio"/> | <input type="radio"/> | <input type="radio"/>      | <input type="radio"/> | <input type="radio"/> |
| Makes it easier to find their owner if they become lost     | <input type="radio"/> | <input type="radio"/> | <input type="radio"/>      | <input type="radio"/> | <input type="radio"/> |
| Is difficult                                                | <input type="radio"/> | <input type="radio"/> | <input type="radio"/>      | <input type="radio"/> | <input type="radio"/> |
| Should be required by law                                   | <input type="radio"/> | <input type="radio"/> | <input type="radio"/>      | <input type="radio"/> | <input type="radio"/> |
| Is unnecessary                                              | <input type="radio"/> | <input type="radio"/> | <input type="radio"/>      | <input type="radio"/> | <input type="radio"/> |
| Is important                                                | <input type="radio"/> | <input type="radio"/> | <input type="radio"/>      | <input type="radio"/> | <input type="radio"/> |
| Is expensive                                                | <input type="radio"/> | <input type="radio"/> | <input type="radio"/>      | <input type="radio"/> | <input type="radio"/> |
| Is the right thing to do                                    | <input type="radio"/> | <input type="radio"/> | <input type="radio"/>      | <input type="radio"/> | <input type="radio"/> |
| Is a practice that members of my household would agree with | <input type="radio"/> | <input type="radio"/> | <input type="radio"/>      | <input type="radio"/> | <input type="radio"/> |
| Is a practice that my neighbours would agree with           | <input type="radio"/> | <input type="radio"/> | <input type="radio"/>      | <input type="radio"/> | <input type="radio"/> |
| Is a practice that my family and friends would agree with   | <input type="radio"/> | <input type="radio"/> | <input type="radio"/>      | <input type="radio"/> | <input type="radio"/> |
| Is a practice that my veterinarian would agree with         | <input type="radio"/> | <input type="radio"/> | <input type="radio"/>      | <input type="radio"/> | <input type="radio"/> |

To what extent do you agree or disagree with the following statement that all pet cats:

|                                              | Strongly disagree     | Disagree              | Neither agree nor disagree | Agree                 | Strongly agree        |
|----------------------------------------------|-----------------------|-----------------------|----------------------------|-----------------------|-----------------------|
| Should be up to date with their vaccinations | <input type="radio"/> | <input type="radio"/> | <input type="radio"/>      | <input type="radio"/> | <input type="radio"/> |

To what extent do you agree or disagree that vaccinating pet cats:

|                                                             | Strongly disagree     | Disagree              | Neither agree nor disagree | Agree                 | Strongly agree        |
|-------------------------------------------------------------|-----------------------|-----------------------|----------------------------|-----------------------|-----------------------|
| Is good for their health and wellbeing                      | <input type="radio"/> | <input type="radio"/> | <input type="radio"/>      | <input type="radio"/> | <input type="radio"/> |
| Is unnatural                                                | <input type="radio"/> | <input type="radio"/> | <input type="radio"/>      | <input type="radio"/> | <input type="radio"/> |
| Is only worthwhile if cats are in contact with other cats   | <input type="radio"/> | <input type="radio"/> | <input type="radio"/>      | <input type="radio"/> | <input type="radio"/> |
| Is difficult                                                | <input type="radio"/> | <input type="radio"/> | <input type="radio"/>      | <input type="radio"/> | <input type="radio"/> |
| Should be required by law                                   | <input type="radio"/> | <input type="radio"/> | <input type="radio"/>      | <input type="radio"/> | <input type="radio"/> |
| Is unnecessary                                              | <input type="radio"/> | <input type="radio"/> | <input type="radio"/>      | <input type="radio"/> | <input type="radio"/> |
| Is important                                                | <input type="radio"/> | <input type="radio"/> | <input type="radio"/>      | <input type="radio"/> | <input type="radio"/> |
| Is expensive                                                | <input type="radio"/> | <input type="radio"/> | <input type="radio"/>      | <input type="radio"/> | <input type="radio"/> |
| Is the right thing to do                                    | <input type="radio"/> | <input type="radio"/> | <input type="radio"/>      | <input type="radio"/> | <input type="radio"/> |
| Is a practice that members of my household would agree with | <input type="radio"/> | <input type="radio"/> | <input type="radio"/>      | <input type="radio"/> | <input type="radio"/> |
| Is a practice that my family and friends would agree with   | <input type="radio"/> | <input type="radio"/> | <input type="radio"/>      | <input type="radio"/> | <input type="radio"/> |
| Is a practice that my veterinarian would agree with         | <input type="radio"/> | <input type="radio"/> | <input type="radio"/>      | <input type="radio"/> | <input type="radio"/> |

To what extent do you agree or disagree with the following statement that all pet cats:

|                                   | Strongly disagree     | Disagree              | Neither agree nor disagree | Agree                 | Strongly agree        |
|-----------------------------------|-----------------------|-----------------------|----------------------------|-----------------------|-----------------------|
| Should be desexed/neutered/spayed | <input type="radio"/> | <input type="radio"/> | <input type="radio"/>      | <input type="radio"/> | <input type="radio"/> |

To what extent do you agree or disagree that desexing/neutering/spaying pet cats:



|                                                             | Strongly disagree     | Disagree              | Neither agree nor disagree | Agree                 | Strongly agree        |
|-------------------------------------------------------------|-----------------------|-----------------------|----------------------------|-----------------------|-----------------------|
| Helps reduce behavioural problems                           | <input type="radio"/> | <input type="radio"/> | <input type="radio"/>      | <input type="radio"/> | <input type="radio"/> |
| Is only worthwhile if cats are in contact with other cats   | <input type="radio"/> | <input type="radio"/> | <input type="radio"/>      | <input type="radio"/> | <input type="radio"/> |
| Is unnatural                                                | <input type="radio"/> | <input type="radio"/> | <input type="radio"/>      | <input type="radio"/> | <input type="radio"/> |
| Is good for their health                                    | <input type="radio"/> | <input type="radio"/> | <input type="radio"/>      | <input type="radio"/> | <input type="radio"/> |
| Is difficult                                                | <input type="radio"/> | <input type="radio"/> | <input type="radio"/>      | <input type="radio"/> | <input type="radio"/> |
| Should be required by law                                   | <input type="radio"/> | <input type="radio"/> | <input type="radio"/>      | <input type="radio"/> | <input type="radio"/> |
| Is unnecessary                                              | <input type="radio"/> | <input type="radio"/> | <input type="radio"/>      | <input type="radio"/> | <input type="radio"/> |
| Is important                                                | <input type="radio"/> | <input type="radio"/> | <input type="radio"/>      | <input type="radio"/> | <input type="radio"/> |
| Is expensive                                                | <input type="radio"/> | <input type="radio"/> | <input type="radio"/>      | <input type="radio"/> | <input type="radio"/> |
| Prevents them from being a nuisance to others               | <input type="radio"/> | <input type="radio"/> | <input type="radio"/>      | <input type="radio"/> | <input type="radio"/> |
| Is the right thing to do                                    | <input type="radio"/> | <input type="radio"/> | <input type="radio"/>      | <input type="radio"/> | <input type="radio"/> |
| Is a practice that members of my household would agree with | <input type="radio"/> | <input type="radio"/> | <input type="radio"/>      | <input type="radio"/> | <input type="radio"/> |
| Is a practice my neighbours would agree with                | <input type="radio"/> | <input type="radio"/> | <input type="radio"/>      | <input type="radio"/> | <input type="radio"/> |

Is a practice that my family and friends would agree with

Is a practice my veterinarian would agree with

To what extent do you agree or disagree with the following statement that all pet cats:

Strongly disagree

Disagree

Neither agree nor disagree

Agree

Strongly agree

Should be allowed to express natural behaviours

To what extent do you agree or disagree that allowing pet cats to express natural behaviours:

|                                                             | Strongly disagree     | Disagree              | Neither agree nor disagree | Agree                 | Strongly agree        |
|-------------------------------------------------------------|-----------------------|-----------------------|----------------------------|-----------------------|-----------------------|
| Helps reduce behavioural problems                           | <input type="radio"/> | <input type="radio"/> | <input type="radio"/>      | <input type="radio"/> | <input type="radio"/> |
| Is unnatural                                                | <input type="radio"/> | <input type="radio"/> | <input type="radio"/>      | <input type="radio"/> | <input type="radio"/> |
| Is good for their health                                    | <input type="radio"/> | <input type="radio"/> | <input type="radio"/>      | <input type="radio"/> | <input type="radio"/> |
| Is difficult                                                | <input type="radio"/> | <input type="radio"/> | <input type="radio"/>      | <input type="radio"/> | <input type="radio"/> |
| Is unnecessary                                              | <input type="radio"/> | <input type="radio"/> | <input type="radio"/>      | <input type="radio"/> | <input type="radio"/> |
| Is important                                                | <input type="radio"/> | <input type="radio"/> | <input type="radio"/>      | <input type="radio"/> | <input type="radio"/> |
| Is the right thing to do                                    | <input type="radio"/> | <input type="radio"/> | <input type="radio"/>      | <input type="radio"/> | <input type="radio"/> |
| Is a practice that members of my household would agree with | <input type="radio"/> | <input type="radio"/> | <input type="radio"/>      | <input type="radio"/> | <input type="radio"/> |
| Is a practice that my family and friends would agree with   | <input type="radio"/> | <input type="radio"/> | <input type="radio"/>      | <input type="radio"/> | <input type="radio"/> |
| Is a practice that my veterinarian would agree with         | <input type="radio"/> | <input type="radio"/> | <input type="radio"/>      | <input type="radio"/> | <input type="radio"/> |

To what extent do you agree or disagree with the following statement that all pet cats:

|                                             | Strongly disagree     | Disagree              | Neither agree nor disagree | Agree                 | Strongly agree        |
|---------------------------------------------|-----------------------|-----------------------|----------------------------|-----------------------|-----------------------|
| Should be fed a nutritionally balanced diet | <input type="radio"/> | <input type="radio"/> | <input type="radio"/>      | <input type="radio"/> | <input type="radio"/> |

To what extent do you agree or disagree that feeding pet cats a nutritionally balanced diet:

|                                                             | Strongly disagree     | Disagree              | Neither agree nor disagree | Agree                 | Strongly Agree        |
|-------------------------------------------------------------|-----------------------|-----------------------|----------------------------|-----------------------|-----------------------|
| Is good for their health                                    | <input type="radio"/> | <input type="radio"/> | <input type="radio"/>      | <input type="radio"/> | <input type="radio"/> |
| Is unnatural                                                | <input type="radio"/> | <input type="radio"/> | <input type="radio"/>      | <input type="radio"/> | <input type="radio"/> |
| Maintains ideal body weight and condition                   | <input type="radio"/> | <input type="radio"/> | <input type="radio"/>      | <input type="radio"/> | <input type="radio"/> |
| Is difficult                                                | <input type="radio"/> | <input type="radio"/> | <input type="radio"/>      | <input type="radio"/> | <input type="radio"/> |
| Makes them friendly                                         | <input type="radio"/> | <input type="radio"/> | <input type="radio"/>      | <input type="radio"/> | <input type="radio"/> |
| Prevents them from being a nuisance to others               | <input type="radio"/> | <input type="radio"/> | <input type="radio"/>      | <input type="radio"/> | <input type="radio"/> |
| Is necessary                                                | <input type="radio"/> | <input type="radio"/> | <input type="radio"/>      | <input type="radio"/> | <input type="radio"/> |
| Is not important                                            | <input type="radio"/> | <input type="radio"/> | <input type="radio"/>      | <input type="radio"/> | <input type="radio"/> |
| Is expensive                                                | <input type="radio"/> | <input type="radio"/> | <input type="radio"/>      | <input type="radio"/> | <input type="radio"/> |
| Prevents them from hunting                                  | <input type="radio"/> | <input type="radio"/> | <input type="radio"/>      | <input type="radio"/> | <input type="radio"/> |
| Is the right thing to do                                    | <input type="radio"/> | <input type="radio"/> | <input type="radio"/>      | <input type="radio"/> | <input type="radio"/> |
| Is a practice that members of my household would agree with | <input type="radio"/> | <input type="radio"/> | <input type="radio"/>      | <input type="radio"/> | <input type="radio"/> |
| Is a practice my friends and family would agree with        | <input type="radio"/> | <input type="radio"/> | <input type="radio"/>      | <input type="radio"/> | <input type="radio"/> |
| Is a practice that my veterinarian would agree with         | <input type="radio"/> | <input type="radio"/> | <input type="radio"/>      | <input type="radio"/> | <input type="radio"/> |

To what extent do you agree or disagree with the following statement that all pet cats:

|                                                    | Strongly disagree     | Disagree              | Neither agree nor disagree | Agree                 | Strongly agree        |
|----------------------------------------------------|-----------------------|-----------------------|----------------------------|-----------------------|-----------------------|
| Should visit the vet annually for a health checkup | <input type="radio"/> | <input type="radio"/> | <input type="radio"/>      | <input type="radio"/> | <input type="radio"/> |

To what extent do you agree or disagree that taking pet cats to the vet for annual health check ups:

|                                                             | Strongly disagree     | Disagree              | Neither agree nor disagree | Agree                 | Strongly agree        |
|-------------------------------------------------------------|-----------------------|-----------------------|----------------------------|-----------------------|-----------------------|
| Is good for their health                                    | <input type="radio"/> | <input type="radio"/> | <input type="radio"/>      | <input type="radio"/> | <input type="radio"/> |
| Is unnatural                                                | <input type="radio"/> | <input type="radio"/> | <input type="radio"/>      | <input type="radio"/> | <input type="radio"/> |
| Is difficult                                                | <input type="radio"/> | <input type="radio"/> | <input type="radio"/>      | <input type="radio"/> | <input type="radio"/> |
| Is necessary                                                | <input type="radio"/> | <input type="radio"/> | <input type="radio"/>      | <input type="radio"/> | <input type="radio"/> |
| Is not important                                            | <input type="radio"/> | <input type="radio"/> | <input type="radio"/>      | <input type="radio"/> | <input type="radio"/> |
| Is expensive                                                | <input type="radio"/> | <input type="radio"/> | <input type="radio"/>      | <input type="radio"/> | <input type="radio"/> |
| Is the right thing to do                                    | <input type="radio"/> | <input type="radio"/> | <input type="radio"/>      | <input type="radio"/> | <input type="radio"/> |
| Is a practice that members of my household would agree with | <input type="radio"/> | <input type="radio"/> | <input type="radio"/>      | <input type="radio"/> | <input type="radio"/> |
| Is a practice that my friends and family would agree with   | <input type="radio"/> | <input type="radio"/> | <input type="radio"/>      | <input type="radio"/> | <input type="radio"/> |
| Is a practice that my veterinarian would agree with         | <input type="radio"/> | <input type="radio"/> | <input type="radio"/>      | <input type="radio"/> | <input type="radio"/> |

From which of the following sources would/do you get information about appropriate cat keeping and care?  
(Please select all that apply)

- Veterinarian
- RSPCA
- Pet Shop
- Friends
- Family
- Zoos Victoria
- General Google Search
- Social media
- Local Council
- Other cat shelter or rescue (e.g. Cat Protection Society, Lost Dogs Home)
- Cat Breeder
- Cat Fancier Association
- Books
- Other (specify) \_\_\_\_\_

How likely would it be that you would act on advice given to you about a/your cat from the following?

|                                                                           | Extremely unlikely    | Unlikely              | Neither likely nor unlikely | Likely                | Extremely likely      |
|---------------------------------------------------------------------------|-----------------------|-----------------------|-----------------------------|-----------------------|-----------------------|
| Veterinarian                                                              | <input type="radio"/> | <input type="radio"/> | <input type="radio"/>       | <input type="radio"/> | <input type="radio"/> |
| RSPCA                                                                     | <input type="radio"/> | <input type="radio"/> | <input type="radio"/>       | <input type="radio"/> | <input type="radio"/> |
| Pet Shop                                                                  | <input type="radio"/> | <input type="radio"/> | <input type="radio"/>       | <input type="radio"/> | <input type="radio"/> |
| Friends                                                                   | <input type="radio"/> | <input type="radio"/> | <input type="radio"/>       | <input type="radio"/> | <input type="radio"/> |
| Family                                                                    | <input type="radio"/> | <input type="radio"/> | <input type="radio"/>       | <input type="radio"/> | <input type="radio"/> |
| Zoos Victoria                                                             | <input type="radio"/> | <input type="radio"/> | <input type="radio"/>       | <input type="radio"/> | <input type="radio"/> |
| General Google search                                                     | <input type="radio"/> | <input type="radio"/> | <input type="radio"/>       | <input type="radio"/> | <input type="radio"/> |
| Social Media                                                              | <input type="radio"/> | <input type="radio"/> | <input type="radio"/>       | <input type="radio"/> | <input type="radio"/> |
| Local Council                                                             | <input type="radio"/> | <input type="radio"/> | <input type="radio"/>       | <input type="radio"/> | <input type="radio"/> |
| Other cat shelter or rescue (e.g. Cat Protection Society, Lost Dogs Home) | <input type="radio"/> | <input type="radio"/> | <input type="radio"/>       | <input type="radio"/> | <input type="radio"/> |
| Cat Breeder                                                               | <input type="radio"/> | <input type="radio"/> | <input type="radio"/>       | <input type="radio"/> | <input type="radio"/> |
| Cat Fancier Association                                                   | <input type="radio"/> | <input type="radio"/> | <input type="radio"/>       | <input type="radio"/> | <input type="radio"/> |
| Books                                                                     | <input type="radio"/> | <input type="radio"/> | <input type="radio"/>       | <input type="radio"/> | <input type="radio"/> |
| Other (specify)                                                           | <input type="radio"/> | <input type="radio"/> | <input type="radio"/>       | <input type="radio"/> | <input type="radio"/> |

How likely is it that you will do the following with [cat's name] in the future?

|                                                                                           | Extremely unlikely    | Unlikely              | Neither likely nor unlikely | Likely                | Extremely likely      |
|-------------------------------------------------------------------------------------------|-----------------------|-----------------------|-----------------------------|-----------------------|-----------------------|
| I intend to keep [cat's name] indoors or in a cat run all the time this month             | <input type="radio"/> | <input type="radio"/> | <input type="radio"/>       | <input type="radio"/> | <input type="radio"/> |
| I intend to start keeping [cat's name] indoors or in a cat run more frequently this month | <input type="radio"/> | <input type="radio"/> | <input type="radio"/>       | <input type="radio"/> | <input type="radio"/> |

Are you:

- Male
- Female
- Non-binary/third gender
- Prefer not to say

What is your postcode?

---

In what year were you born?

---



What is your *household* annual income from all sources, before taxes?

- Less than \$30,000
- \$30,001 to \$50,000
- \$50,001 to \$70,000
- \$70,001 to \$90,000
- \$90,001 to \$120,000
- \$120,001 to \$150,000
- \$150,001 to \$200,000
- \$200,001 plus
- Prefer not to say

Which of the following best describes your employment status?

- Retired
- Unemployed
- Unable to work
- Engaged in home duties
- Casual paid work
- Part time paid work (30 hours or less per week or seasonal work)
- Full time paid work (31+ hours a week)
- Student
- Other (write) \_\_\_\_\_
- Prefer not to say

Which of the following best describes your current occupation?

- None
- Farm owner or manager
- Manager (Sales manager)
- Researcher
- Professional (e.g. Dietician, Accountant, Teacher)
- Technician or Trade worker (e.g. plumber)
- Community or Personal Service (e.g. child carer)
- Clerical or administration work (e.g. receptionist, data entry)
- Sales (e.g. sales assistant, sales representative)
- Machine operator (e.g. truck driver, storeperson)
- Labourer (e.g. cleaner, gardener, farm labourer)
- Other \_\_\_\_\_
- Prefer not to say

What is your highest level of education?

- Primary School
- Secondary School
- TAFE College
- University (Undergraduate degree)
- University (Postgraduate degree)
- No formal schooling
- Other \_\_\_\_\_
- Prefer not to say

Which of the following best describes where you live?

- Inner city
- Inner suburban
- Outer suburban
- Major regional city
- Small regional town
- Semi-rural
- Rural
- Remote

In what kind of dwelling do you currently live?

- House with large outside space (4 acres and up)
- House with medium outside space (large garden or less than 4 acres)
- House with small outside space (patio or small garden/courtyard)
- Semi-detached, terrace or townhouse with medium outside space (large garden)
- Semi-detached, terrace or townhouse with small outside space (patio or small garden/courtyard)
- Flat, unit, apartment with small outside space (balcony or patio)
- Flat, unit, apartment with no outside space
- Other \_\_\_\_\_

Which of the following best describes your ownership of this dwelling?

- I or my family owns or is paying it off
- I or my family rent it
- Other \_\_\_\_\_

Which of the following people usually live with you? (*Please tick all that apply*)

- Partner (spouse or de facto)
- One or more adults over 65 years
- One or more adults between 18 and 65 years
- One or more children between 12-18 years
- One or more children under 12
- Other

In the last 12 months how many times have you visited Melbourne Zoo, Werribee Open Range Zoo, or Healesville Sanctuary?

- Never
- Once
- A few times
- More than 5 times

When were you last at the Zoo?

---

Do you have a Zoos Victoria membership?

- Yes
- No
